# Supplementary material
Source: publisher figshare collection journal article supplement (https://scielo.figshare.com/articles/dataset/_/6503672)
Supplement: Supplementary file 1 [file Table_1.xls]

## Sheet: Table_1
<b>Patient</b>	<b>Age (y)/ Sex</b>	<b>Diagnosis</b>	<b>Aneurysm Location</b>	<b>Size (mm)</b>	<b>Neck</b>	<b>Ictus</b>	<b>HH</b>	<b>FS</b>	<b>Remodeling Balloon</b>	<b>Stent Assistance</b>
1	59/F	Multiple aneurysms	L PComm	13	Wide	NA	NA	1	4×15	No
2	60/M	Multiple aneurysms	AComm	8	Wide	NA	NA	1	4×7	No
3	50/F	Subarachnoid aneurysm	Basilar tip	10	Wide	D4	1	2	4×20	6x20
4	54/M	Headache	Basilar tip	13	Wide	NA	NA	1	No	4×20; 4×15
5	48/F	Multiple aneurysms	L Ophthalmic ICA	25	Wide	NA	NA	1	No	Flow diverter
6	57/F	Subarachnoid aneurysm	AComm	7	Small	D3	3	4	4×7	No
7	80/F	Ophthalmoparesis	R Cavernous ICA	30	Wide	NA	NA	1	No	Flow diverter
8	47/F	Subarachnoid aneurysm	L PComm	3	Small	4 months	1	2	No	No
9	50/F	Headache	AComm	10	Wide	NA	NA	1	No	4×20
10	61/F	Subarachnoid aneurysm	AComm	3	Wide	D2	2	3	4×7	No
