# Supplementary material
Source: publisher figshare collection journal article supplement (https://scielo.figshare.com/articles/dataset/_/6503672)
Supplement: Supplementary file 2 [file Table_2.xls]

## Sheet: Table_2
<b>Patient</b>	<b>Aneurysm Location</b>	<b>Thrombus distribution</b>	<b>Solitaire</b>	<b>IA Drug</b>	<b>Number of Stent Passes</b>	<b>Procedure Time (min)</b>	<b>Occlusion time</b>	<b>Final mTICI</b>	<b>Imm. mRS</b>	<b>Discharge Condition</b>	<b>Late mRS</b>	<b>Late Clinical Outcome</b>	<b>Employment Status</b>
1	L PComm	L MCA (M3)	4×20	No	2	75	23	3	0	Complete recovery	0	Complete recovery	Returned to work
2	AComm	L ACA (A2)	4×20	Abciximab	3	127	28	3	0	Complete recovery	0	Complete recovery	Returned to work
3	Basilar tip	L PCA (P1 and P3)	4×15	No	4	169	38	3	3	R homonymous hemianopia	2	R homonymous hemianopia	Retired by age
4	Basilar tip	R PCA (P2)	4×15	rTPA	1	135	15	3	0	Complete recovery	0	Complete recovery	Returned to work
5	L Ophthalmic ICA	L MCA (M1)	4×15	No	7	90	60	2a	5	L MCA stroke; Hemorrhagic transformation; decompressive craniectomy; severe deficits	4	Bedridden and dependent – hemiplegia and apraxia	Retired by disease
6	AComm	R MCA (M1)	4×15	No	4	138	37	2b	4	Cognitive impairment + L hemiparesis	3	Cognitive impairment + L upper limb monoparesis	Retired by disease
7	R Cavernous ICA	R MCA (M1)	4×20	rTPA	7	22	95	2b	3	L hemiparesis	1	Gradual recovery of motor strength	Already retired by age
8	L PComm	L MCA (M2)	4×20	rTPA	6	57	77	2a	3	Aphasia + central facial paralysis	1	Gradual rehabilitation	Returned to work
9	AComm	L MCA (M2)	4×15	rTPA	2	135	20	2b	0	Complete recovery	0	Complete recovery	Returned to work
10	AComm	L MCA (M1)	4×20	No	3	60	45	3	0	Complete recovery (after ventriculoperitoneal shunt)	0	Complete recovery	Returned to work
